# Supplementary material
Source: PubMed Central journal article supplement (PMC3980013)
Supplement: NIHMS566524-supplement-1.pdf [file NIHMS566524-supplement-1.pdf]

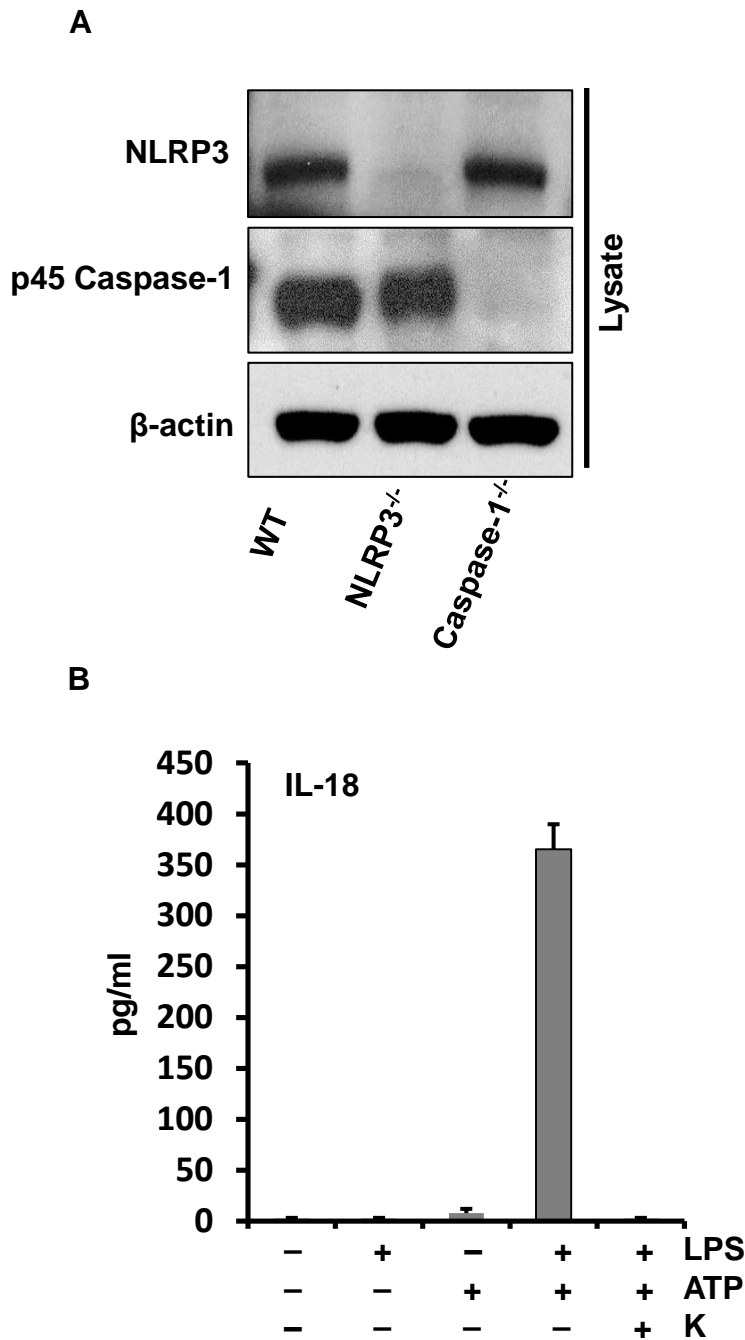

**Figure S1: Confirmation of NLRP3 and caspase-1 roles in IL-18 processing. (A)**

Immunoblots of cell lysate confirm the absence of *Nlrp3* or Caspase-1 expression in *Nlrp3*<sup>-/-</sup> and *Casp1*<sup>-/-</sup> iBMDMs.. **(B)** Monocytes were pretreated with potassium (100 mM) just prior to LPS (1 µg/ml) priming for 30 min. Supernatants were harvested after an additional 30 min of ATP (5mM) and assayed for IL-18 release.

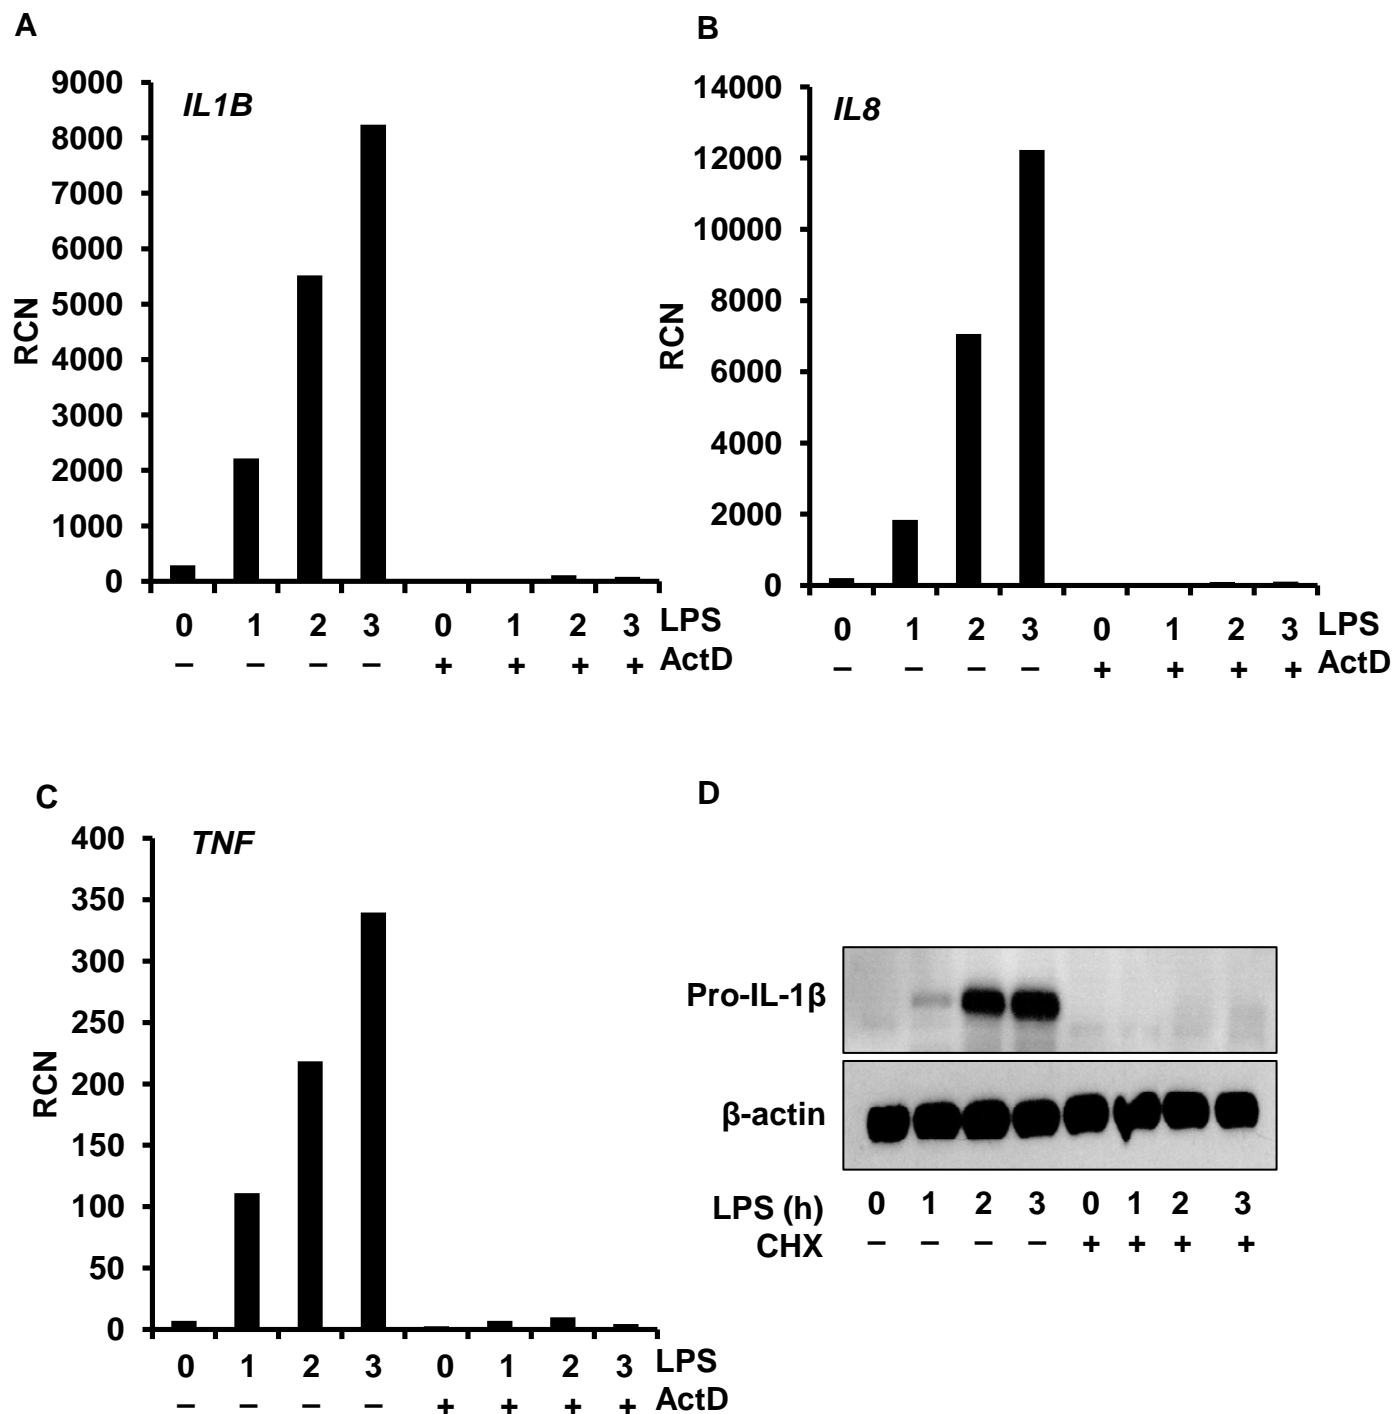

**Figure S2: Actinomycin and Cycloheximide inhibit transcription and new protein translation.** Monocytes were pretreated with either actinomycin D or cycloheximide for 30 min prior stimulation with LPS (1  $\mu$ g/ml) for the specified time periods (0-3 hours). The effect of Actinomycin D on transcription was estimated by measuring the RNA message using RT-q-PCR (**A,B,C**). Cell lysates were immunoblotted for the induction of proIL-1 $\beta$  by LPS (**D**).

**A Intracellular**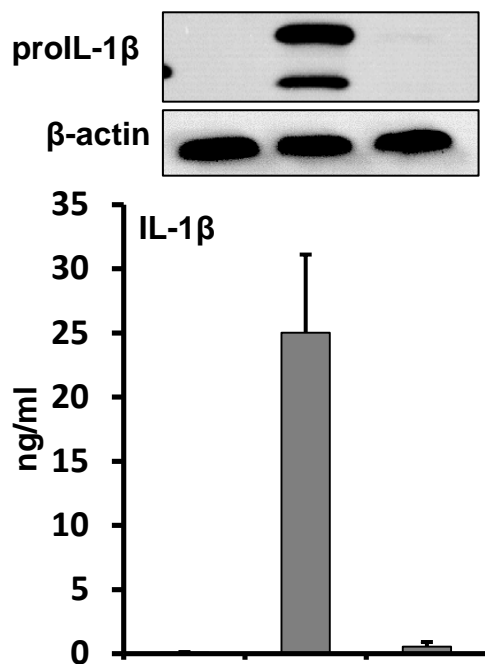**B**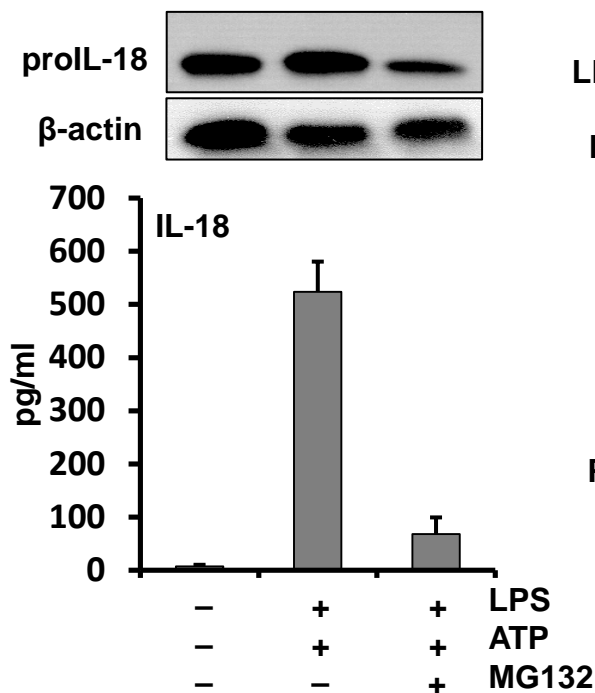**C**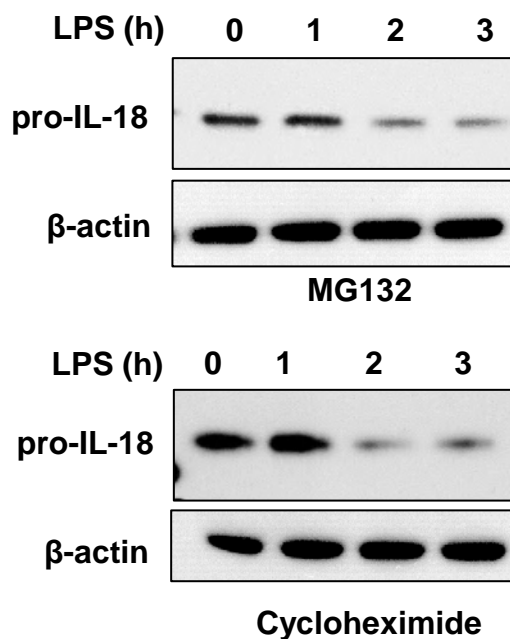**D**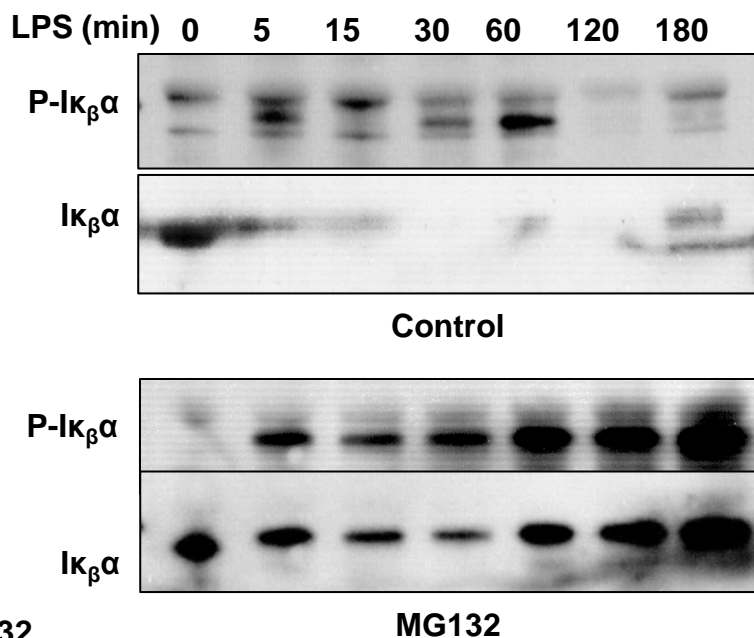

**Figure S3: Proteasome inhibition blocks pro-IL-1 $\beta$  synthesis but also affect steady state monocyte pro-IL-18 levels after long term priming.** Monocytes were pretreated with/without MG132 30 min prior to longer term LPS priming in order to allow time for proIL-1 $\beta$  synthesis (see Figure 1). Shown are the cell lysates by immunoblot and the cell supernatant concentrations by ELISA for **(A)** IL-1 $\beta$  and **(B)** IL-18. **(C)** The ability of MG132 or the protein synthesis inhibitor cycloheximide to affect the intracellular proIL-18 levels over 3 h time as detected by immunoblot. **(D)** MG132 function as a proteasome inhibitor was confirmed by its ability to prevent the LPS induced degradation while maintaining the newly induced phosphorylation of IkB $\alpha$ .

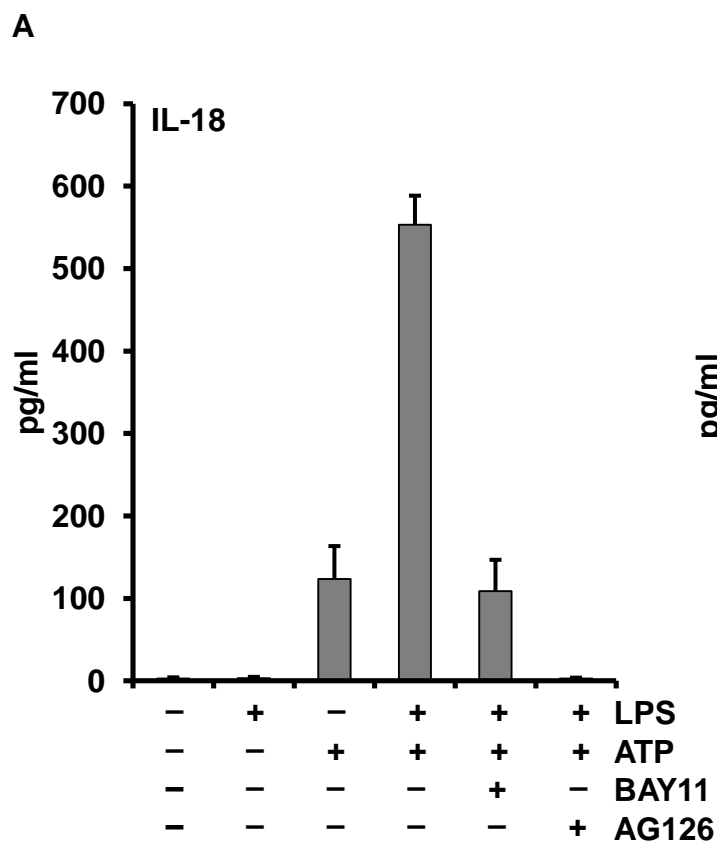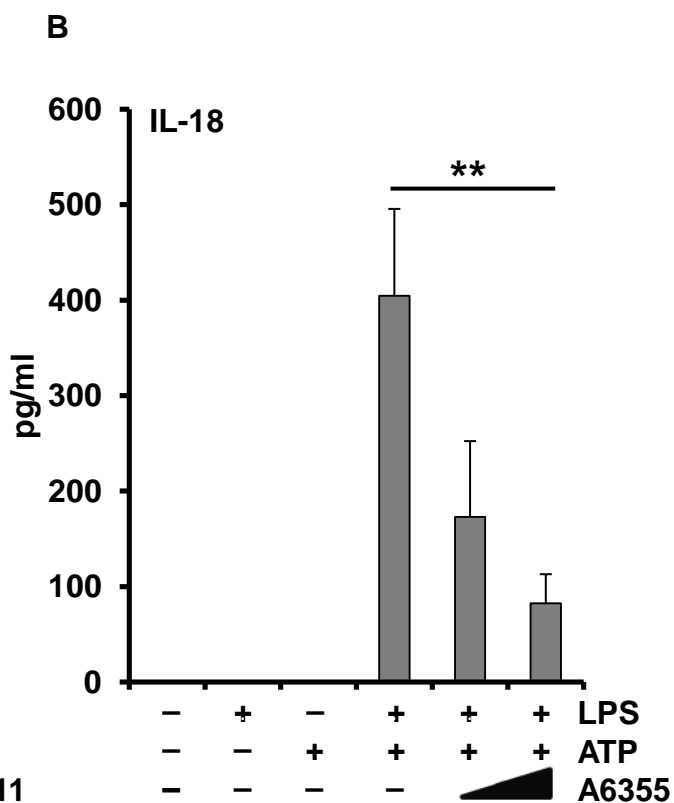

**Figure S4: NFκB inhibitor BAY11 and the tyrosine kinase inhibitor AG126 and the specific ERK inhibitor A6355 prevent IL-18 release.** Monocytes were pretreated with BAY11 or AG126 or A6355 (10 and 20 μM) 30 min before LPS (1 μg/ml) priming for 30 min, followed by a final 30 min of ATP (5mM). Supernatants were analyzed for IL-18 by ELISA as described, \*\* p < 0.05.
